# Supplementary material
Source: PubMed Central journal article supplement (PMC5290198)
Supplement: NIHMS827017-supplement-1.pdf [file NIHMS827017-supplement-1.pdf]

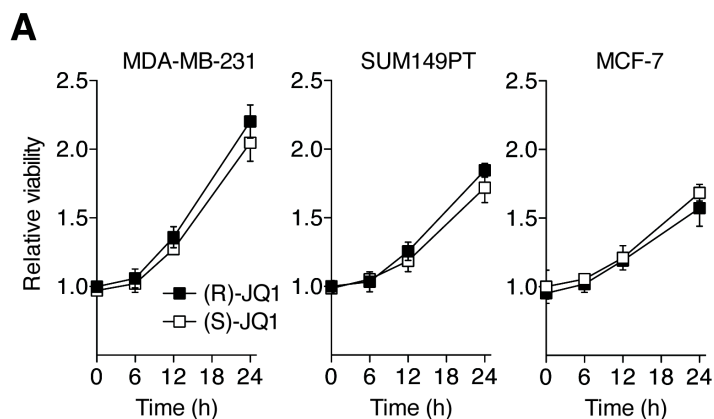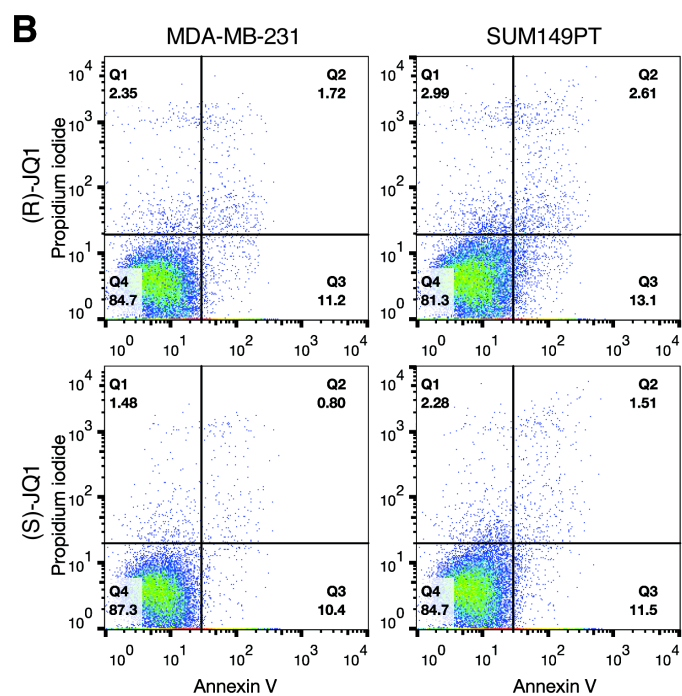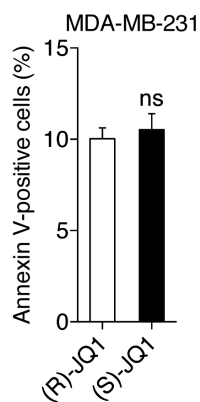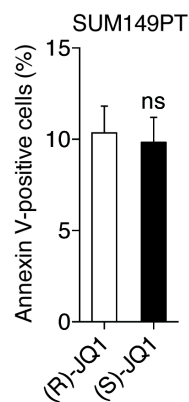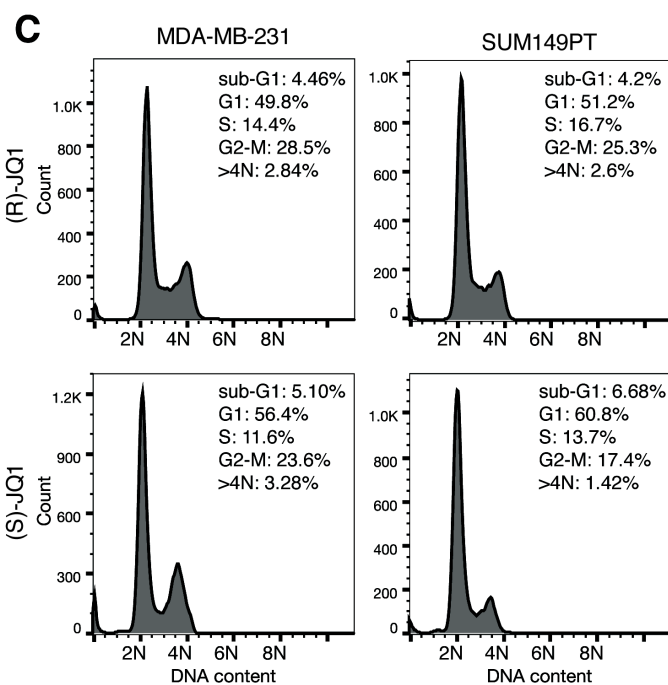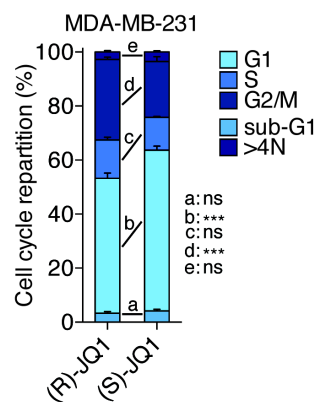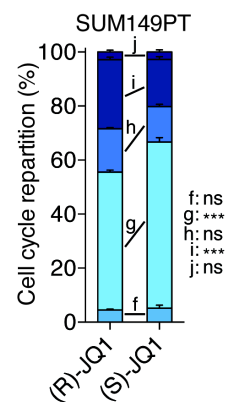

### **Figure S1. Pan-BET protein inhibition does not affect cell proliferation or viability**

(A) MTT assay showing viability of MDA-MB-231, SUM149PT and MCF-7 cells treated either with 400 nM (R)-JQ1 (filled symbol) or (S)-JQ1 (open symbol) for the indicated times. Dots represent means  $\pm$  SEM of three independent experiments. Statistical analysis was performed by using two-way ANOVA.

(B) Dot plots of annexin V/propidium iodide co-staining of MDA-MB-231 and SUM149PT cells treated with either 400 nM (R)-JQ1 (upper panels) or (S)-JQ1 (lower panels) for 24h. Quadrant 1 (Q1): necrotic cells, Q2: late apoptotic cells, Q3: early apoptotic cells, Q4: viable cells. The percentage of cells in each quadrant is indicated. At least 20,000 cells were analyzed (n=3). Bottom panel: bars show means  $\pm$  SEM of the percentage of annexin V-positive cells (n=3). Statistical analysis was performed by using Student's t test.

(C) Cell cycle distribution of MDA-MB-231 and SUM149PT treated with 400 nM (R)-JQ1 (upper panels) or (S)-JQ1 (lower panels) for 24h. The percentage of cells in each phase is indicated. At least 10,000 cells were analyzed (n=3). Bottom panel: bars show means  $\pm$  SEM of the percentage of cells in each phase of the cell cycle (n=3). Statistical analysis was performed by using two-way ANOVA.
