# Supplementary material
Source: PubMed Central journal article supplement (PMC5290198)
Supplement: NIHMS827017-supplement-2.pdf [file NIHMS827017-supplement-2.pdf]

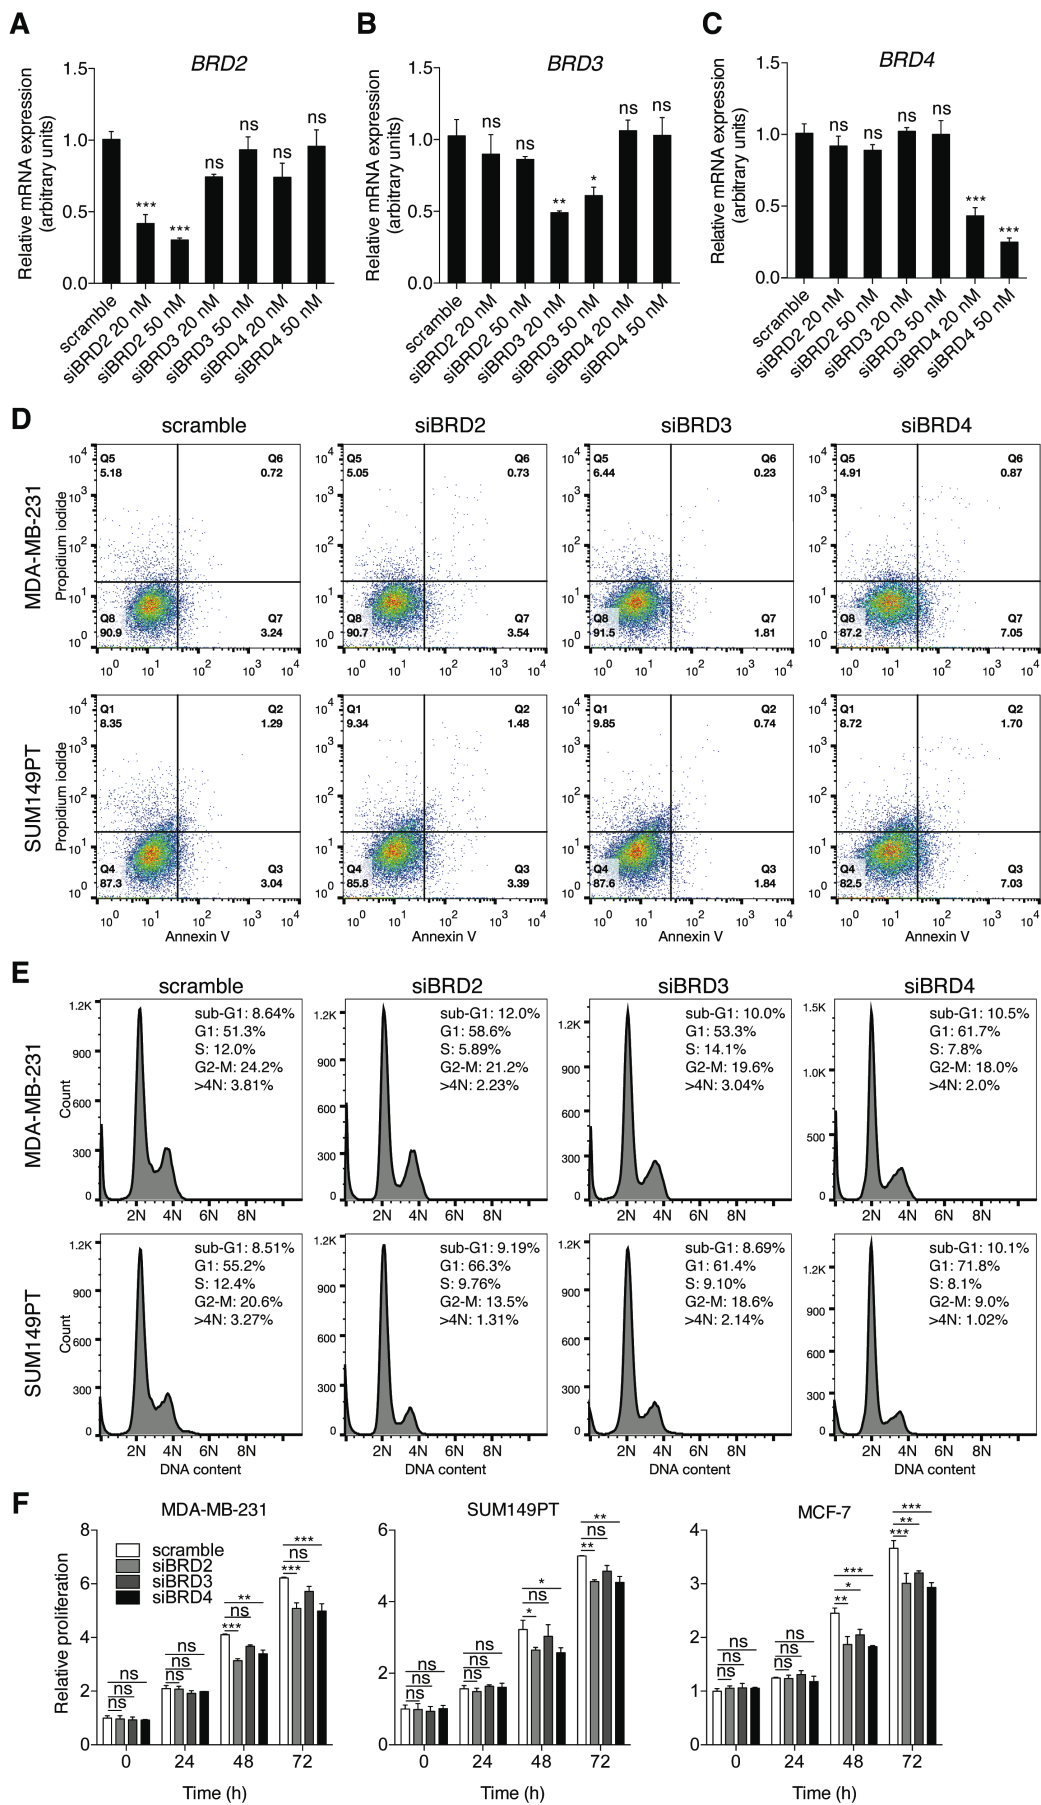

## Figure S2. BET protein specificity and proliferation/survival

(A-C) Relative mRNA expression levels of BRD2 (A), BRD3 (B), and BRD4 (C) in scrambled siRNA control or BRD2-, BRD3-, BRD4-depleted MDA-MB-231 cells. Bars show means  $\pm$  SEM of three independent experiments. Statistical analyses were performed by using one-way ANOVA.

(D) Dotplot of Annexin V/propidium iodide co-staining of MDA-MB-231 and SUM149PT cells treated with scramble, siBRD2, siBRD3 or BRD4 siRNA for 72h. Quadrant 1 (Q1): necrotic cells, Q2: late apoptotic cells, Q3: early apoptotic cells, Q4: viable cells. At least 20,000 cells were analyzed (n=3).

(E) Cell cycle distribution of MDA-MB-231 and SUM149PT treated with scrambled siRNA control, siBRD2, siBRD3 or siBRD4 for 72h. At least 10,000 cells were analyzed (n=3).

(F) MTT assay showing proliferation of MDA-MB-231, SUM149PT and MCF-7 treated with scramble, siBRD2, siBRD3 or BRD4 siRNA for 72h for the indicated times. Bars represent means  $\pm$  SEM of three independent experiments. Statistical analysis was performed by using two-way ANOVA.
