# Supplementary material
Source: PubMed Central journal article supplement (PMC5290198)
Supplement: NIHMS827017-supplement-3.pdf [file NIHMS827017-supplement-3.pdf]

**A**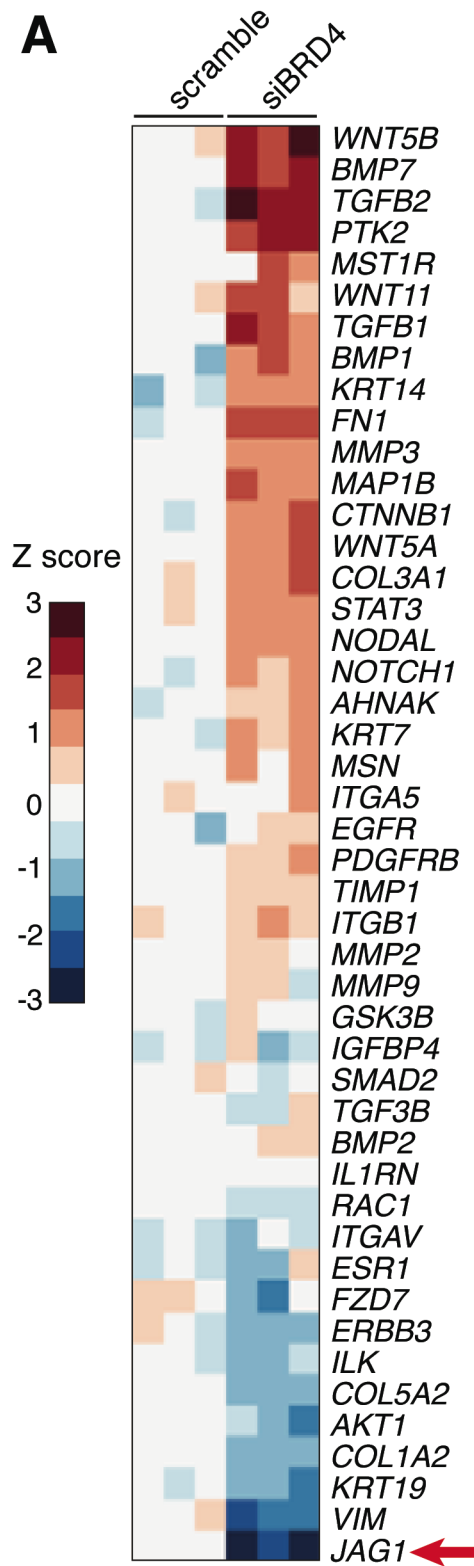**B**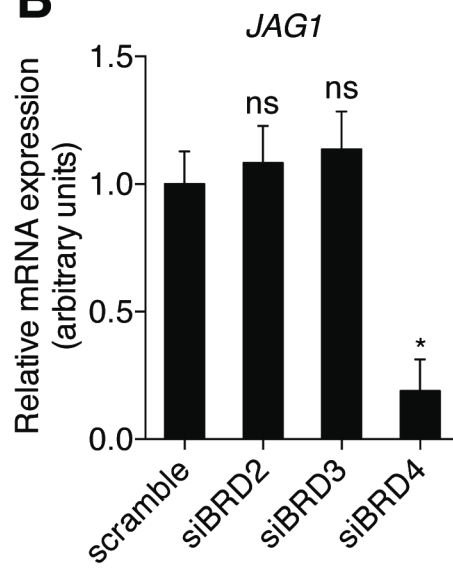**C**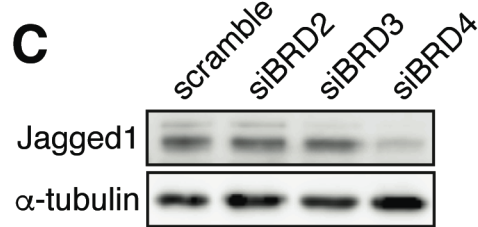**D**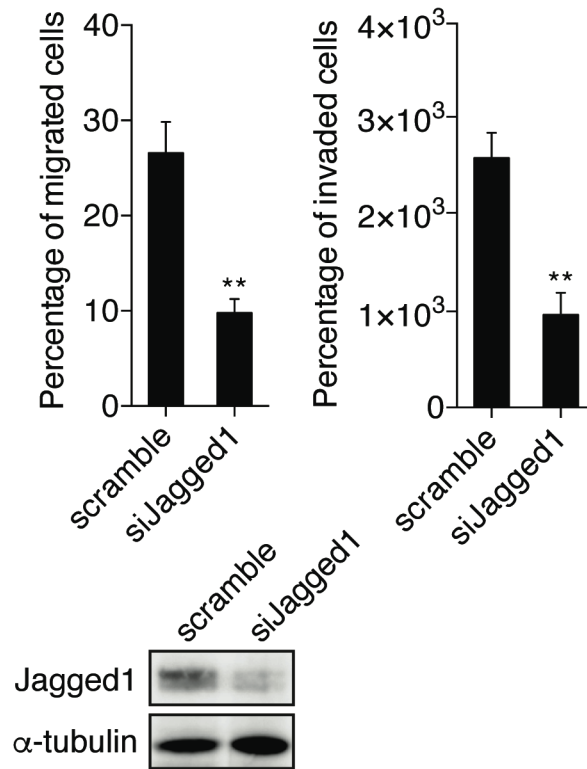

### **Figure S3. Jagged1 function in SUM149PT cells**

(A) Heatmap representing relative expression of 46 genes involved in regulation of migration and invasion in response to BRD4 depletion in SUM149PT cells. Z scores are represented using a color code. Results for separate knockdown experiments were considered (n = 3).

(B-C) Jagged1 mRNA (A) and protein (B) expression were measured in SUM149PT cells 72h after transfection with the indicated siRNAs (50 nM). Statistical analyses were performed by using one-way ANOVA.

(D) Migration (left panel) and invasion (right panel) assays were conducted with scramble or Jagged1-depleted SUM149PT cells. Bars show means  $\pm$  SEM of three independent experiments. Statistical analyses were performed by using Student's t test. Bottom panel: immunoblot validated Jagged1 depletion in SUM149PT 48h after transfection with the indicated siRNAs (20 nM).
