# Supplementary material
Source: PubMed Central journal article supplement (PMC5290198)
Supplement: NIHMS827017-supplement-5.pdf [file NIHMS827017-supplement-5.pdf]

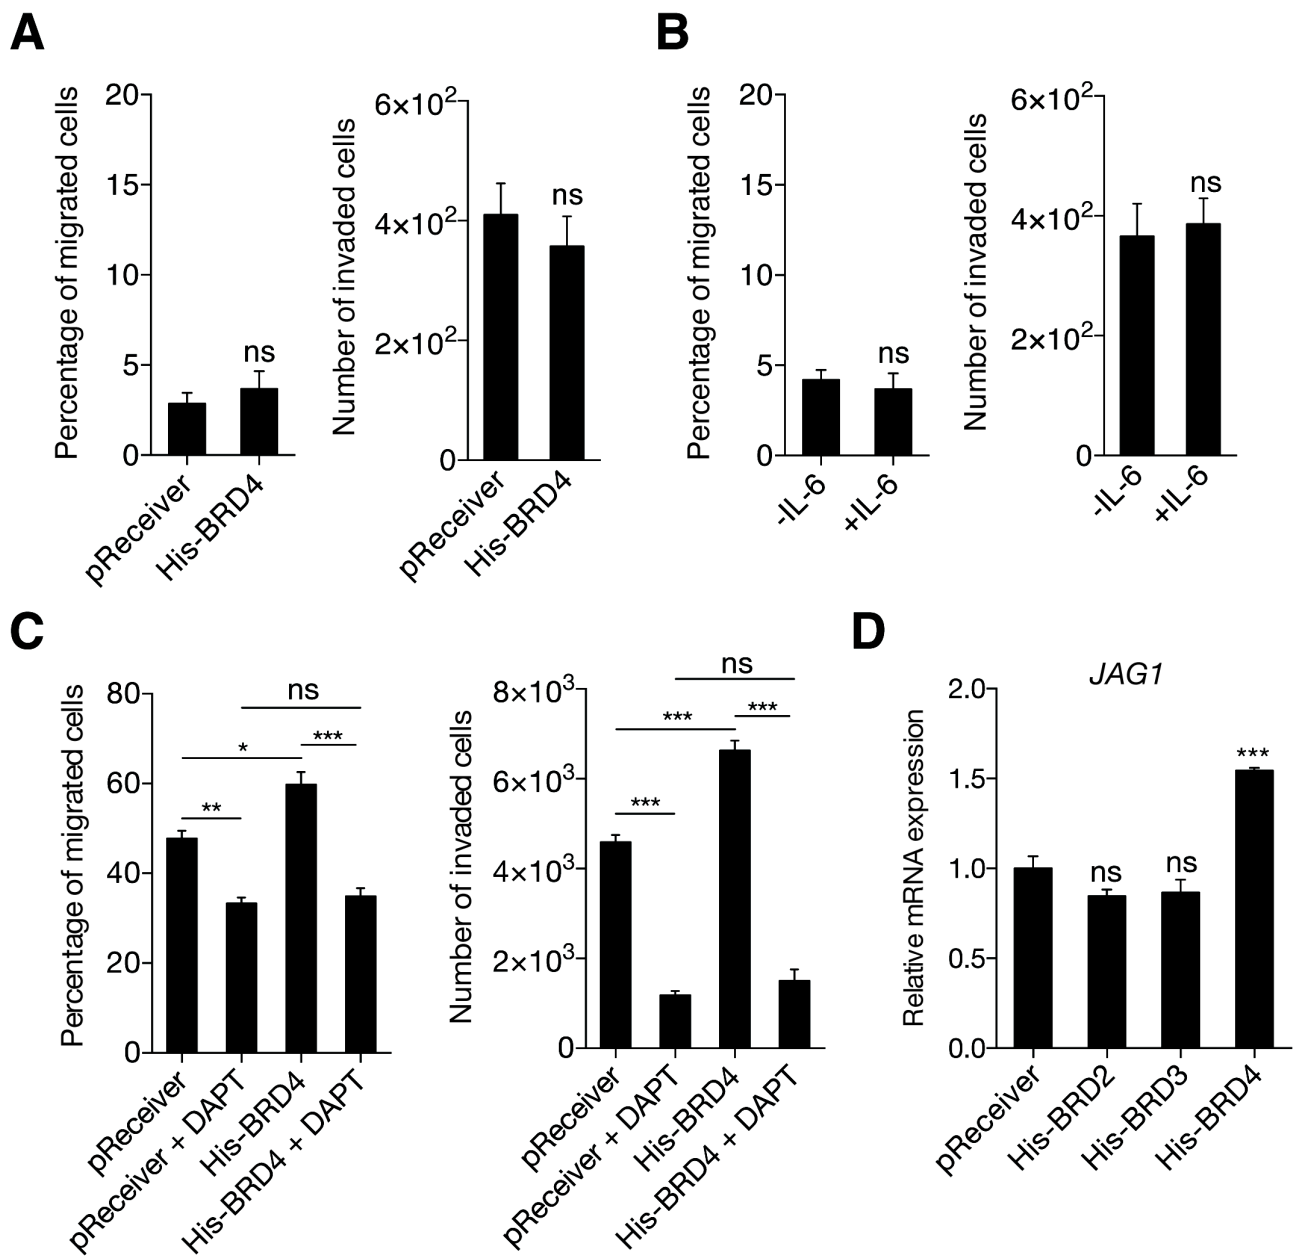

**Figure S5. BRD4 regulates migration and invasion through Notch signaling.**

(A-C) Migration (left panels) and invasion (right panels) assays were conducted using MCF-7 cells under (A) BRD4 over-expression, (B) treatment with IL-6 (50 ng/ml for 24h), (C) BRD4 over-expression and treatment with DAPT (10  $\mu$ M for 16 h). Bars show means  $\pm$  SEM of three independent experiments. Statistical analyses were performed by using Student's t test or one-way ANOVA.

(D) Jagged1 and mRNA expression were measured in MDA-MB-231 cells 48h after transfection with the indicated plasmids. Statistical analyses were performed by using one-way ANOVA.
